# Supplementary material for: Non-Hodgkin Lymphoma Risk and Variants in Genes Controlling Lymphocyte Development
Source: PLoS One. 2013 Sep 30;8(9):e75170. doi: 10.1371/journal.pone.0075170 (PMC3787098; doi:10.1371/journal.pone.0075170)
Supplement: File S1 — Table S1. Candidate genes chosen based on biological interest. Table S2. SNPs tested for replication. Table S3. SNPs that passed quality control. Table S4. Logistic regression analysis results for SNPs with pG<0.05 before multiple testing correction. Table S5. The best model for rs33003 in European-ancestry DLBCL vs. controls is the recessive model. (XLS) [file pone.0075170.s001.xls]

## Sheet: Table S1
Table S1. Candidate genes chosen based on biological interest.
Genes in this table were chosen regardless of previous reported association results. However, some of them had been studied previously; this is indicated here.
Additional SNPs chosen solely to replicate published associations involving other genes are listed in Table S2.
'-' indicates no association reported
Gene of biological interest		Previously reported in lymphoid cancer association study		Associated SNP (Identified by name used in the published report)
		No previous association study	PubMed IDs of previous association studies (Diseases)
Immunity and Inflammation
	AICDA		19336552 (NHL)	-
	BRD2	X
	CCL5		10446961 (AIDS-related NHL)	CCL5-delta32
	CD69	X
	CD74	X
	CD81	X
	CTLA4		16849765 (MALT)	CTLA4 -318 C/T
			16849765 (MALT)	CTLA4 49 G/G
			15953005 (NHL)	CTLA4 49 A
			15953005 (NHL)	3'-untranslated region (AT)(82)
			15953005 (NHL)	CTLA4-318C:49A
	HFE		19806355 (childhood ALL)	rs807212
			10627122 (childhood ALL)	C282Y
			10374855 (AML)	-
			12002748 (Hodgkin)	-
	IFNAR2	X
	IFNB1	X
	IFNG		21418178 (Hodgkin)	rs2069718
			21067287 (childhood ALL)	rs2069727
	IL10RA		20299965 (AIDS-related NHL)	-
			16971956 (Hodgkin)	Ser138Gly
	IL1RN		22524835 (childhood lymphoma)	not specified
			21250972 (NHL)	rs2637988
			18038187 (T-NHL)	rs454078
			16389181 (NHL)	-
			9384710 (secondary AML)	IL-1RN*4
	IL4		21418175 (NHL)	rs2243263
			20299965 (AIDS-related NHL)	-
			19508433 (childhood lymphoma)	-
			16449530 (T-NHL)	rs2243263
	IL6		19573080 (familial Hodgkin and Waldenström)	rs6952003
			19573080 (familial Hodgkin and Waldenström)	rs2069840
			19508433 (childhood lymphoma)	-
			16449530 (T-NHL)	rs1800797
			16449530 (T-NHL)	rs1800795
			16389181 (NHL)	-
	IL7	X
	IL7R		20952689 (NHL adjusted by BMI)	rs1494555
	IRF4		19804451 (Hodgkin)	rs872071
			18758461 (CLL)	rs872071
			19390683 (NHL)	rs12211228
			19897031 (childhood ALL)	rs12203592
	IRF5	X
	ITGAM	X
	JAK1	X
	JAK3		22524835 (childhood lymphoma)	-
	KIAA1542	X
	LTA		22666399 (NHL)	-
			20047977 (NHL)	rs909253
			19390683 (NHL)	rs2844484
			18990758 (NHL)	rs2239704
			16389181 (NHL)	-
	PKX	X
	PRDM1	X
	PRMT5	X
	SPIB	X
	SPP1	X
	STAT3		21418178 (NHL)	rs1053023
Cell death
	AGTR1	X
	APAF1		20855536 (NHL)	-
	BAD		20855536 (NHL)	-
	BAK1		20855536 (NHL)	-
	BCL11A	X
	BCL2L1/BCLXL		19336552 (NHL)	-
			20855536 (NHL)	-
	BCL2L2		19336552 (NHL)	-
	BID		20855536 (NHL)	-
	BIK		20855536 (NHL)	-
	BIRC3		20855536 (NHL)	-
	BMF		21418178 (DLBCL)	rs3923235
			21418178 (DLBCL)	rs7183977
	CASP1		19414860 (NHL)	rs1785882
			20855536 (NHL)	-
	CASP10		17071630 (MZL)	rs3900115
			20855536 (NHL)	-
	CASP3		17071630 (NHL)	rs6948
			20855536 (NHL)	-
	CASP4		20855536 (NHL)	-
	CASP8		17071630 (MZL)	rs13113
			19414860 (NHL)	rs6736233
			21633787 (NHL)
			20855536 (NHL)	-
	CD40		20473910 (NHL)	rs1883832
			18287517 (FL)	rs1883832
			19390683 (NHL)	-
	CDH22	X
	CFLAR		19390683 (FL)	rs12620435
	FASLG		19390683 (NHL)	-
	IGFBP3	X
	IL2		16389181 (NHL)	-
			22524835 (childhood lymphoma)	rs2069762
	IL8	X
	IL8RB	X
	ITCH	X
	MDM4	X
	MYC		20087644 (NHL)	-
			19336552 (CLL/SLL)	rs16902359
	NEDD4	X
	NFKB1		19223558 (Hodgkin)	rs1585215
			18990758 (NHL)	rs4648022
			19390683 (NHL)	-
	NFKB2		19390683 (NHL)	-
	PARP1		20196871 (NHL)	Val762Ala
	PAX5	X
	RASSF1	X
	REL		21037568 (Hodgkin)	rs1432295
			18990758 (NHL)	-
			19390683 (NHL)	-
	RELA		19390683 (NHL)	-
	RELB		19390683 (NHL)	-
	TLR2		22134717 (childhood ALL)	-
			19029192 (MZL)	rs3804100
			16971956 (FL)	16933T>A
	TNFSF10		19573080 (CLL & Waldenström)	rs2241063
			19573080 (CLL & Waldenström)	rs3136597
			19390683 (CLL)	rs365238
	TP73		15291355 (NHL)	G4C14-to-A4T14 (G4A)
	ZFX	X
DNA repair
	APEX1		21987080 (childhood ALL)	rs11160711, rs3120073 haplotype
	ATR	X
	BIN3	X
	C11orf30	X
	CCND1		20087644 (NHL)	-
			19336552 (NHL)	rs603965
			19336552 (NHL)	rs2450254
	CDK7	X
	CDKN2A		21889209 (childhood ALL)	-
			17008550 (childhood ALL)	-222 T/A
			21414664 (ALL & AML)	-
	CHEK1	X
	CHEK2		21744992 (Hodgkin)	all rare
	E2F1	X
	E2F2	X
	E2F3	X
	ERCC2		18315909 (NHL)	-
			16738949 (NHL)	rs1052559
			16492913 (FL)	-
			22321329 (ALL)	A23G
			21987080 (childhood ALL)	rs3916874, rs238416, rs171140 haplotype
			21463130 (childhood ALL)	-
			19736055 (DLBCL)	751 Gln
			19657998 (BCL)	-
			19280628 (Hodgkin)	-
			19101034 (childhood ALL)	-
	ERCC5		16738949 (NHL)	rs17655
	EXO1	X
	H2AFZ	X
	HIC1	X
	HINT1	X
	LIG1	X
	LIG3	X
	LIG4		21476145 (FL)	-
			12471202 (MM)	A3V
			12471202 (MM)	T9I
	MGMT		19954624 (NHL)	L84F
			17666372 (NHL)	Ile143Val
			17666372 (NHL)	Lys178Arg
	MSH2		14580774 (NHL)	-
			12688322 (lymphoma, leukemia, MDS)	gIVS12-6T > C
			11890986 (NHL)	gIVS12-6T>C
			11809679 (familial hematological cancers and café-au-lait spots)	1662–1 G>A
			17601929 (familial TCL)	226C>T; Q76X
	MSH3		14510941 (childhood ALL)	-
	MSH6	X
	MTHFR		22094326 (childhood ALL)	C677T
			22017305 (childhood ALL)	-
			21810727 (NHL)	-
			21748308 (childhood ALL)	-
			21702646 (ALL)	C677T
			21657963 (adult ALL)	C677T
			21495160 (childhooh ALL)	C677T
			21055808 (NHL)	-
			20824655 (childhood ALL)	A1298C
			20445408 (childhood ALL)	C677T
			20409583 (childhood ALL)	-
			20367562 (childhood ALL)	C677T
			20101025 (ALL and AML)	-
			20071789 (childhood ALL)	-
			20002681 (childhood ALL)	C677T
			19963111 (FL)	A1298C
			19651439 (childhood ALL)	C677T
			18421714 (childhood ALL)	A1298C
			18061941 (NHL and CLL)	-
			18042267 (NHL)	C677T
			18042267 (NHL)	A1298C
			17970089 (adult ALL)	-
			17891500 (NHL)	C677T
			17712558 (DLBCL)	C677T
			17712558 (DLBCL)	A1298C
			17071478 (childhood AML)	C677T
			17071478 (childhood AML)	A1298C
			17035405 (adult ALL)	C677T
			16923565 (childhood ALL)	C677T
			16923565 (childhood ALL)	A1298C
			16886608 (childhood ALL)	A1298C
			16799656 (childhood lymphoma)	C677T
			16799656 (childhood lymphoma)	A1298C
			16706930 (ALL and CML)	A1298C
			16410450 (FL)	C677T
			16410450 (FL)	A1298C
			16365025 (NHL)	-
			16123993 (childhood ALL)	C677T
			16096524 (childhood ALL)	C677T
			15921520 (childhood ALL)	-
			15551285 (lymphoma)	C677T or A1298C
			15289015 (ATL)	-
			15198953 (NHL)	C677T
			15159311 (adult ALL)	C677T
			15003888 (ALL)	-
			12958073 (childhood ALL)	C677T
			12958073 (childhood ALL)	A1298C
			12827651 (childhood ALL)	-
			11342450 (lymphoma)	C677T or A1298C
			11274424 (childhood ALL)	C677T
	MTR		21810727 (NHL)	-
			21748308 (childhood ALL)	-
			21657963 (adult ALL)	-
			21055808 (NHL)	A2756G
			20237949 (PCNLS)	D919G
			20101025 (childhood ALL)	A2756G
			19775302 (childhood ALL)	-
			17891500 (NHL)	-
			16410450 (FL)	A2756G
			16365025 (NHL)	-
			15198953 (NHL)	A2756G
	OGG1		20364408 (childhood ALL)	Ser326Cys
			17149600 (NHL)	-
			16543247 (NHL)	-
	PLK1	X
	PMS2		17851451 (familial haematological malignancies)	all rare
	POLB	X
	POLD1	X
	PTEN	X
	RAD51		21987080 (childhood ALL)	rs2304579, rs7177265, rs2304580 haplotype
	RAD52	X
	RAD54B	X
	RAG1		21476145 (FL)	-
	RB1	X
	RPA1	X
	TP53BP1	X
	TYMS		22397721 (NHL)	C1053T
			22166040 (NHL and ALL)	2R > 3R
			21810727 (Hodgkin)	-
			21748308 (childhood ALL)	rs1059393
			21657963 (ALL)	-
			21463130 (childhood ALL)	2R > 3R
			20824655 (childhood ALL)	3'-TYMS -6bp/-6bp
			20237949 (PCNLS)	-
			19775302 (childhood ALL)	-
			19651439 (childhood ALL)	3'-TYMS -6bp/-6bp
			18042267 (TCL)	2R > 3R
			17891500 (FL)	Ex8+157
			16410450 (FL)	2R > 3R
			16365025 (NHL)	2R > 3R
			15198953 (NHL)	3'-TYMS -6bp/-6bp
	UNG	X
	WRN		21476145 (FL)	-
			16738949 (NHL)	rs1346044
	XRCC1		22321329 (ALL)	-
			21463130 (childhood ALL)	-
			20511665 (childhood ALL)	G28152A
			20394984 (childhood ALL)	Arg399Gln
			20013659 (childhood ALL)	194Trp, 280His, 399Gln haplotype
			19963133 (DLBCL)	Arg194Trp
			19657998 (BCL)	Arg194Trp
			19280628 (Hodgkin)	Arg399Gln
			19101034 (childhood ALL)	Arg194Trp
			17666372 (NHL)	Arg194Trp
			16492913 (FL)	-
			16435384 (childhood ALL)	Arg194Trp
			16435384 (childhood ALL)	Arg399Gln
			15596292 (childhood ALL)	Arg399Gln
			15104288 (lymphoma)	-
	XRCC3		16492913 (FL)	rs3212024
			16492913 (FL)	rs3212038
			16492913 (FL)	rs3212090
	XRCC4		21987080 (childhood ALL)	rs7711825, rs1193695, rs301276, rs301287, rs3777018 haplotype
			21987080 (childhood ALL)	rs1193695, rs301276, rs301287 haplotype
			20813000 (NHL)	rs13178127
	XRCC5	X
	YY1	X

## Sheet: Table S2
Table S2. SNPs tested for replication
These SNPs were chosen solely for replication and do not necessarily relate to Immunity and Inflammation, Cell Death or DNA Repair
SNP	Gene	Reference title
rs1045642	ABCB1	ABCB1 (MDR1) rs1045642 is associated with increased overall survival in plasma cell myeloma.	Drain S, Catherwood MA, Orr N, Galligan L, Rea IM, Hodkinson C, Drake MB, Kettle PJ, Morris TC, Alexander HD. Leuk Lymphoma 2009;50:566-70.
rs1130409	APEX1	Polymorphisms in three base excision repair genes and breast cancer risk in Thai women.	Sangrajrang S, Schmezer P, Burkholder I, Waas P, Boffetta P, Brennan P, Bartsch H, Wiangnon S, Popanda O. Breast Cancer Res Treat 2008;111:279-88.
rs10149339	BCLW	Germline Variation in Apoptosis Pathway Genes and Risk of Non-Hodgkin Lymphoma	Kelly JL, Novak AJ, Fredericksen ZS, Liebow M, Ansell SM, Dogan A, Wang AH, Witzig TE, Call TG, Kay NE, Habermann TM, Slager SL, et al. Cancer Epidemiol Biomarkers Prev 2010;19:2847-58.
rs7142474	BCLW	Germline Variation in Apoptosis Pathway Genes and Risk of Non-Hodgkin Lymphoma	Kelly JL, Novak AJ, Fredericksen ZS, Liebow M, Ansell SM, Dogan A, Wang AH, Witzig TE, Call TG, Kay NE, Habermann TM, Slager SL, et al. Cancer Epidemiol Biomarkers Prev 2010;19:2847-58.
rs1535094	BCLW	Germline Variation in Apoptosis Pathway Genes and Risk of Non-Hodgkin Lymphoma	Kelly JL, Novak AJ, Fredericksen ZS, Liebow M, Ansell SM, Dogan A, Wang AH, Witzig TE, Call TG, Kay NE, Habermann TM, Slager SL, et al. Cancer Epidemiol Biomarkers Prev 2010;19:2847-58.
rs6746608	BIM	Germline Variation in Apoptosis Pathway Genes and Risk of Non-Hodgkin Lymphoma	Kelly JL, Novak AJ, Fredericksen ZS, Liebow M, Ansell SM, Dogan A, Wang AH, Witzig TE, Call TG, Kay NE, Habermann TM, Slager SL, et al. Cancer Epidemiol Biomarkers Prev 2010;19:2847-58.
rs12613243	BIM	Germline Variation in Apoptosis Pathway Genes and Risk of Non-Hodgkin Lymphoma	Kelly JL, Novak AJ, Fredericksen ZS, Liebow M, Ansell SM, Dogan A, Wang AH, Witzig TE, Call TG, Kay NE, Habermann TM, Slager SL, et al. Cancer Epidemiol Biomarkers Prev 2010;19:2847-58.
rs724710	BIM	Germline Variation in Apoptosis Pathway Genes and Risk of Non-Hodgkin Lymphoma	Kelly JL, Novak AJ, Fredericksen ZS, Liebow M, Ansell SM, Dogan A, Wang AH, Witzig TE, Call TG, Kay NE, Habermann TM, Slager SL, et al. Cancer Epidemiol Biomarkers Prev 2010;19:2847-58.
rs1052576	CASP9	Genetic variants in caspase genes and susceptibility to non-Hodgkin lymphoma	Lan Q, Zheng T, Rothman N, Zhang Y, Wang SS, Shen M, Berndt SI, Zahm SH, Holford TR, Leaderer B, Yeager M, Welch R, et al. Blood 2006;107:4101-8.
rs603965	CCND1	Cyclin D1 splice variant and risk for non-Hodgkin lymphoma	Wang SS, Cozen W, Severson RK, Hartge P, Cerhan JR, Davis S, Welch R, Rothman N, Chanock SJ. Hum Genet 2006;120:297-300.
rs5742909	CTLA4	Association of T-Cell Regulatory Gene Polymorphisms With Susceptibility to Gastric Mucosa-Associated Lymphoid Tissue Lymphoma	Cheng TY, Lin JT, Chen LT, Shun CT, Wang HP, Lin MT, Wang TE, Cheng AL, Wu MS. J Clin Oncol 2006;24:3483-9.
rs231775	CTLA4	Association of T-Cell Regulatory Gene Polymorphisms With Susceptibility to Gastric Mucosa-Associated Lymphoid Tissue Lymphoma	Cheng TY, Lin JT, Chen LT, Shun CT, Wang HP, Lin MT, Wang TE, Cheng AL, Wu MS. J Clin Oncol 2006;24:3483-9.
rs3212986	ERCC1	Polymorphisms in ERCC1 and susceptibility to childhood acute lymphoblastic leukemia in a Chinese population.	Wang SL, Zhao H, Zhou B, Chen YL, Zou Y, Zhu XF, Li QS, Han MZ, Yang RC, Han ZC. Leuk Res 2006;30:1341-5.
rs13181	ERCC2	DNA Repair Polymorphisms Associated with Cytogenetic Subgroups in B-Cell Chronic Lymphocytic Leukemia	Ganster C, Neesen J, Zehetmayer S, Jager U, Esterbauer H, Mannhalter C, Kluge B, Fonatsch C. Genes Chromosomes Cancer 2009;48:760-7.
rs17655	ERCC5	Polymorphisms in DNA repair genes and risk of non-Hodgkin lymphoma among women in Connecticut.	Shen M, Zheng T, Lan Q, Zhang Y, Zahm SH, Wang SS, Holford TR, Leaderer B, Yeager M, Welch R, Kang D, Boyle P, et al. Hum Genet 2006;119:659-68.
rs1800562	HFE	HFE gene mutations in susceptibility to childhood leukemia: HuGE review	Dorak MT, Burnett AK, Worwood M. Genet Med 2005;7:159-68.
rs3135932	IL10RA	Gene polymorphisms in Toll-like receptors, interleukin-10, and interleukin-10 receptor alpha and lymphoma risk.	Nieters A, Beckmann L, Deeg E, Becker N. Genes Immun 2006;7:615-24.
rs454078	IL1RN	Prognostic significance of host immune gene polymorphisms in follicular lymphoma survival	Cerhan JR, Wang S, Maurer MJ, Ansell SM, Geyer SM, Cozen W, Morton LM, Davis S, Severson RK, Rothman N, Lynch CF, Wacholder S, et al. Blood 2007;109:5439-46.
rs2069762	IL2	Prognostic significance of host immune gene polymorphisms in follicular lymphoma survival	Cerhan JR, Wang S, Maurer MJ, Ansell SM, Geyer SM, Cozen W, Morton LM, Davis S, Severson RK, Rothman N, Lynch CF, Wacholder S, et al. Blood 2007;109:5439-46.
rs2243248	IL4	Cytokine polymorphisms in the Th1/Th2 pathway and susceptibility to non-Hodgkin lymphoma	Lan Q, Zheng T, Rothman N, Zhang Y, Wang SS, Shen M, Berndt SI, Zahm SH, Holford TR, Leaderer B, Yeager M, Welch R, et al. Blood 2006;107:4101-8.
rs1805014	IL4R	Analysis of the Ser786Pro Interleukin-4 Receptor α Allelic Variant in Allergic and Nonallergic Asthma and Its Functional Consequences	Andrews RP, Burrell L, Rosa-Rosa L, Cunningham CM, Brzezinski JL, Bernstein JA, Khurana Hershey GK. Clin Immunol 2001;100:298-304
rs4073	IL8	Prognostic significance of host immune gene polymorphisms in follicular lymphoma survival	Cerhan JR, Wang S, Maurer MJ, Ansell SM, Geyer SM, Cozen W, Morton LM, Davis S, Severson RK, Rothman N, Lynch CF, Wacholder S, et al. Blood 2007;109:5439-46.
rs12537284	IRF5	Genome-wide association scan in women with systemic lupus erythematosus identifies susceptibility variants in ITGAM, PXK, KIAA1542 and other loci.	Harley JB, Alarcon-Riquelme ME, Criswell LA, Jacob CO, Kimberly RP, Moser KL, Tsao BP, Vyse TJ, Langefeld CD, Nath SK, Guthridge JM, Cobb BL, et al. Nat Genet 2008;40:204-10.
rs9888739	ITGAM	Genome-wide association scan in women with systemic lupus erythematosus identifies susceptibility variants in ITGAM, PXK, KIAA1542 and other loci.	Harley JB, Alarcon-Riquelme ME, Criswell LA, Jacob CO, Kimberly RP, Moser KL, Tsao BP, Vyse TJ, Langefeld CD, Nath SK, Guthridge JM, Cobb BL, et al. Nat Genet 2008;40:204-10.
rs4963128	KIAA1542	Genome-wide association scan in women with systemic lupus erythematosus identifies susceptibility variants in ITGAM, PXK, KIAA1542 and other loci.	Harley JB, Alarcon-Riquelme ME, Criswell LA, Jacob CO, Kimberly RP, Moser KL, Tsao BP, Vyse TJ, Langefeld CD, Nath SK, Guthridge JM, Cobb BL, et al. Nat Genet 2008;40:204-10.
rs2844484	LTA	Common gene variants in the tumor necrosis factor (TNF) and TNF receptor superfamilies and NF-kB transcription factors and non-Hodgkin lymphoma risk.	Wang SS, Purdue MP, Cerhan JR, Zheng T, Menashe I, Armstrong BK, Lan Q, Hartge P, Kricker A, Zhang Y, Morton LM, Vajdic CM, et al. PLoS One 2009;4:e5360.
rs2308321	MGMT	Polymorphisms in DNA repair and one-carbon metabolism genes and overall survival in diffuse large B-cell lymphoma and follicular lymphoma	Wang SS, Maurer MJ, Morton LM, Habermann TM, Davis S, Cozen W, Lynch CF, Severson RK, Rothman N, Chanock SJ, Hartge P, Cerhan JR. Leukemia 2009;23:596-602.
rs2303428	MSH2	Genetic variation in genes expressed in the germinal center and risk of B cell lymphoma among Caucasians	Scott K, Adamson PJ, Willett EV, Worrillow LJ, Allan JM. Haematologica 2008;93:1597-600.
rs1801131	MTHFR	Methylenetetrahydrofolate reductase gene (MTHFR) polymorphisms and reduced risk of malignant lymphoma.	Matsuo K, Hamajima N, Suzuki R, Ogura M, Kagami Y, Taji H, Yasue T, Mueller NE, Nakamura S, Seto M, Morishima Y, Tajima K. Am J Hematol 2004;77:351-7.
rs1801133	MTHFR	Methylenetetrahydrofolate reductase gene (MTHFR) polymorphisms and reduced risk of malignant lymphoma.	Matsuo K, Hamajima N, Suzuki R, Ogura M, Kagami Y, Taji H, Yasue T, Mueller NE, Nakamura S, Seto M, Morishima Y, Tajima K. Am J Hematol 2004;77:351-7.
rs1805087	MTR	Polymorphisms in folate-metabolizing genes and risk of non-Hodgkin's lymphoma.	Weiner AS, Beresina OV, Voronina EN, Voropaeva EN, Boyarskih UA, Pospelova TI, Filipenko ML. Leuk Res 2011;35:508-15.
rs6445975	PKX	Population differences in SLE susceptibility genes: STAT4 and BLK, but not PXK, are associated with systemic lupus erythematosus in Hong Kong Chinese.	Yang W, Ng P, Zhao M, Hirankarn N, Lau CS, Mok CC, Chan TM, Wong RW, Lee KW, Mok MY, Wong SN, Avihingsanon Y, et al. Genes Immun 2009;10:219-26.
rs2227973	RAG1	Polymorphisms in DNA repair genes and risk of non-Hodgkin lymphoma among women in Connecticut.	Shen M, Zheng T, Lan Q, Zhang Y, Zahm SH, Wang SS, Holford TR, Leaderer B, Yeager M, Welch R, Kang D, Boyle P, et al. Hum Genet 2006;119:659-68.
rs1800471	TGFB1	Genotypic variation in the transforming growth factor-beta1 gene: association with transforming growth factor-beta1 production, fibrotic lung disease, and graft fibrosis after lung transplantation	Awad MR, El-Gamel A, Hasleton P, Turner DM, Sinnott PJ, Hutchinson IV. Transplantation 1998;66:1014-20.
rs4696480	TLR2	Gene polymorphisms in Toll-like receptors, interleukin-10, and interleukin-10 receptor alpha and lymphoma risk	Nieters A, Beckmann L, Deeg E, Becker N. Genes Immun 2006;7:615-24.
rs4986790	TLR4	Association study of a functional Toll-like receptor 4 polymorphism with susceptibility to gastric mucosa-associated lymphoid tissue lymphoma.	Hellmig S, Fischbach W, Goebeler-Kolve ME, Folsch UR, Hampe J, Schreiber S. Leuk Lymphoma 2005;46:869-72.
rs1346044	WRN	Polymorphisms in DNA repair genes and risk of non-Hodgkin lymphoma among women in Connecticut	Shen M, Zheng T, Lan Q, Zhang Y, Zahm SH, Wang SS, Holford TR, Leaderer B, Yeager M, Welch R, Kang D, Boyle P, et al. Hum Genet 2006;119:659-68.
rs3212038	XRCC3	Variation in DNA repair genes ERCC2, XRCC1, and XRCC3 and risk of follicular lymphoma.	Smedby KE, Lindgren CM, Hjalgrim H, Humphreys K, Schollkopf C, Chang ET, Roos G, Ryder LP, Falk KI, Palmgren J, Kere J, Melbye M, et al. Cancer Epidemiol Biomarkers Prev 2006;15:258-65.
rs3212090	XRCC3	Variation in DNA repair genes ERCC2, XRCC1, and XRCC3 and risk of follicular lymphoma.	Smedby KE, Lindgren CM, Hjalgrim H, Humphreys K, Schollkopf C, Chang ET, Roos G, Ryder LP, Falk KI, Palmgren J, Kere J, Melbye M, et al. Cancer Epidemiol Biomarkers Prev 2006;15:258-65.
N.B. Although the gene name is included for the reader's reference, the genes listed were not fully tagged. Rather, specific SNPs were tested for replication.

## Sheet: Table S3
Table S3. SNPs that passed quality control.
Cell death	AGTR1	rs5186
	APAF1	rs12369297
		rs1439122
		rs17028590
		rs2278361
		rs2288714
		rs2288732
		rs4319556
		rs7299536
	BAD	rs11231740
		rs3815362
		rs477895
		rs876064
	BAK1	rs11757379
		rs17627049
		rs210131
		rs210135
		rs210137
		rs513349
		rs5745582
	BCL11A	rs10184550
		rs12477097
		rs1510481
		rs17029708
		rs17331129
		rs1896297
		rs2058703
		rs2457660
		rs2556376
		rs3765154
		rs4672393
		rs6545816
		rs6732518
		rs6738440
		rs6739994
		rs733628
		rs7579014
		rs7581162
		rs7606173
		rs766432
	BCL2L1	rs12479491
		rs6060563
		rs6060679
	BCL2L2	rs10149339
		rs1535094
		rs7142474
	BID	rs17742109
		rs181396
		rs181397
		rs181405
		rs181410
		rs181417
		rs366542
		rs3788284
		rs391085
		rs405098
		rs424708
		rs5747339
		rs5747349
		rs5747353
	BIK	rs13815
		rs4988406
		rs738276
		rs747745
		rs760699
		rs8136891
		rs877334
	BIRC3	rs11602147
		rs3460
	BMF	rs10518679
		rs11634257
		rs12913170
		rs500804
		rs546220
		rs588739
		rs652196
		rs998713
	CASP1	rs1785882
		rs2282659
		rs571593
		rs580253
	CASP10	rs12693932
	CASP3	rs12507711
		rs2696056
		rs2705881
		rs2705897
		rs2720378
		rs4647609
	CASP4	rs12293970
		rs1944900
		rs543923
		rs571407
		rs609092
		rs7125155
	CASP8	rs1035140
		rs1035142
		rs12990906
		rs1861270
		rs3769821
		rs3769825
		rs6736233
		rs7608692
	CD40	rs1010310
		rs11569309
		rs11569333
		rs11698063
		rs13042657
		rs13045771
		rs1320999
		rs1321001
		rs1883838
		rs2248597
		rs2425756
		rs2425773
		rs2425785
		rs2425795
		rs2425836
		rs2425861
		rs2868767
		rs3765459
		rs3904164
		rs4142256
		rs4810488
		rs4813001
		rs6017767
		rs6032681
		rs6032754
		rs6065945
		rs6074024
		rs6074037
		rs6074041
		rs6074045
		rs6074061
		rs6131030
		rs6131034
		rs745307
	CDH22	rs3915737
	CFLAR	rs12620435
		rs2041766
	FASLG	rs12135884
		rs17370527
		rs2639614
		rs2859242
		rs5030772
		rs6700734
		rs763110
	IGFBP3	rs2453839
		rs2471551
		rs3110697
		rs6670
	IL2	rs2069762
	IL8	rs4073
	IL8RB	rs1126579
	ITCH	rs4911154
		rs6059851
		rs6579167
	MDM4	rs11240762
		rs12041243
		rs12094388
		rs12740708
		rs2045624
		rs4252717
		rs875093
	MYC	rs2648841
		rs3891248
	NEDD4	rs11071223
		rs11630780
		rs16976644
		rs17819282
		rs4774830
		rs7177177
		rs8027843
		rs8033275
	NFKB1	rs13117745
		rs1599961
		rs1609798
		rs230506
		rs230547
		rs3774959
		rs4648006
		rs4648037
		rs4648090
		rs4648127
		rs93059
	NFKB2	rs2145308
		rs4919632
	PARP1	rs2271347
		rs3219049
		rs3219142
		rs3754376
		rs6668851
		rs6675427
	PAX5	rs10758411
		rs10814501
		rs12553834
		rs12554674
		rs1320473
		rs16933812
		rs1815916
		rs3739440
		rs3758176
		rs3758180
		rs4880051
		rs7020413
		rs7044118
		rs7044466
	RASSF1	rs2236947
		rs2301639
	REL	rs13031237
		rs842647
	RELA	rs11820062
		rs7101916
	RELB	rs12609547
		rs1560725
	TLR2	rs4696480
	TNFSF10	rs17535790
		rs17601515
		rs1823227
		rs231981
		rs231983
		rs233998
		rs3136594
		rs3136597
		rs3136607
		rs3181139
	TP73	rs10910003
		rs1181868
		rs12731705
		rs1885859
		rs2208993
		rs3765692
		rs3765695
		rs3765696
		rs3765701
		rs3765702
		rs3765703
		rs3765715
		rs3765730
		rs3765731
		rs3765753
		rs3765767
		rs3819967
		rs4648545
		rs4648546
	ZFX	rs17312136
		rs2704849
		rs5949211
		rs5990013
		rs6526373
		rs6629824
Immunity & Inflammation	AICDA	rs2028373
		rs714629
		rs9971686
	BRD2	rs17840186
		rs206776
		rs3097645
		rs565876
		rs620202
		rs683208
	CCL5	rs3817655
	CD69	rs10844706
		rs3176789
		rs3176792
		rs3176800
	CD74	rs11749903
		rs2288817
		rs7722480
	CD81	rs2521252
		rs731909
	CTLA4	rs5742909
	HFE	rs1800562
	IFNAR2	rs2248412
		rs2248420
		rs2834166
		rs4986956
		rs7280479
		rs8127500
		rs8130779
	IFNB1	rs1051922
	IFNG	rs1861493
		rs2069716
		rs2069718
	IL10RA	rs3135932
	IL1RN	rs454078
	IL4	rs2243248
		rs2243263
	IL6	rs1474348
		rs1800797
		rs2069840
	IL7	rs1036751
		rs11998154
		rs1545228
		rs16906063
		rs2919921
		rs6993386
	IL7R	rs11567694
		rs11567762
		rs13167136
		rs1353251
		rs1494571
	IRF4	rs1050975
		rs12203592
		rs12211228
		rs1877175
		rs2001508
		rs3778607
		rs6900384
		rs7768807
		rs872071
		rs9392502
	IRF5	rs12537284
	ITGAM	rs9888739
	JAK1	rs1497056
		rs17127114
		rs2780816
		rs2780898
		rs310199
		rs310222
		rs310244
		rs310247
	JAK3	rs10419991
		rs2110586
		rs3212701
		rs3212714
		rs3212741
		rs3212760
		rs3212798
	KIAA1542	rs4963128
	LTA	rs1799964
		rs1800630
		rs2239704
		rs2844482
		rs2844484
		rs361525
		rs909253
		rs915654
	PKX	rs6445975
	PRDM1	rs1340064
		rs4946722
		rs535780
		rs573869
		rs6924807
		rs811925
		rs9320149
		rs9372117
	PRMT5	rs8007089
	SPIB	rs1137895
		rs11669020
		rs3745516
		rs3816551
	SPP1	rs11728697
		rs2853749
		rs6532040
	STAT3	rs17593222
		rs2293152
		rs3809758
		rs7211777
DNA repair	APEX1	rs1130409
	ATR	rs11707731
		rs11920625
		rs13085261
		rs1802904
		rs2229032
		rs6805118
		rs9856772
	BIN3	rs12676084
		rs13269603
		rs2280104
		rs4872529
	C11orf30	rs1939469
		rs2508756
		rs2513514
		rs3758715
		rs7942257
	CCND1	rs603965
	CDK7	rs2930949
		rs2972390
	CDKN2A	rs2811710
		rs2811712
		rs3218009
		rs3218020
		rs3731257
		rs4074785
	CHEK1	rs10893405
		rs3731426
		rs3731438
		rs492510
		rs515255
		rs537046
		rs540436
		rs565416
	CHEK2	rs1033667
		rs1076807
		rs17507066
		rs17508019
		rs2073327
		rs4035540
		rs5762746
		rs5762763
		rs9608698
	E2F1	rs2071054
	E2F2	rs1107081
		rs2075995
		rs2742976
		rs3218203
		rs6667575
		rs760607
	E2F3	rs10946384
		rs11964747
		rs12527393
		rs16883842
		rs2328488
		rs2328524
		rs3806114
		rs4134938
		rs4134945
		rs4142184
		rs6938550
		rs7747931
		rs7752992
		rs7760528
		rs911361
		rs9295471
	ERCC2	rs13181
	ERCC5	rs17655
	EXO1	rs1047840
		rs10802996
		rs11581448
		rs12118937
		rs12564134
		rs1635510
		rs17391703
		rs1776131
		rs1776148
		rs1776181
		rs2797604
		rs3754093
		rs4149867
		rs4150018
		rs4408133
		rs7521516
		rs9350
	H2AFZ	H2AZ-DWN(+4)-CT
		H2AZ-IVS4(-74)-AG
		rs3756087
	HIC1	rs1048483
		rs12451211
		rs903158
	HINT1	rs2551038
		rs3864283
	LIG1	rs2116492
		rs2288883
		rs3730842
		rs3731037
		rs3786764
		rs8100261
	LIG3	rs1003918
		rs3744358
		rs4796030
	LIG4	rs10131
		rs1151402
		rs12428162
		rs1555902
		rs1805386
		rs1805388
	MGMT	rs10829626
		rs11016803
		rs11016833
		rs12243174
		rs12917
		rs1434744
		rs1762433
		rs1762438
		rs2308321
		rs3793905
		rs3793908
		rs7075748
		rs7909964
	MSH2	rs2303428
	MSH3	rs10075024
		rs10474632
		rs12515548
		rs1650737
		rs181747
		rs245397
		rs249634
		rs33003
		rs6151627
		rs836797
	MSH6	rs1800936
		rs2020911
		rs2072447
		rs3136228
		rs3136245
		rs3136279
		rs3136326
		rs3136329
		rs330792
		rs6713506
	MTHFR	rs1801133
	MTR	rs1805087
	OGG1	rs159153
		rs2072668
		rs2269112
	PLK1	rs27770
		rs35635
		rs8043623
	PMS2	rs12112229
		rs2286681
		rs2345060
		rs6463524
	POLB	rs3136711
		rs3136717
	POLD1	rs1673041
		rs3219281
		rs4802703
	PTEN	rs11202609
		rs1234219
	RAD51	rs11633269
		rs2619681
		rs3092981
		rs5030783
	RAD52	rs1060499
		rs11064607
		rs11571425
		rs2887531
		rs3748522
		rs6413436
		rs7307680
		rs7311151
		rs7962050
	RAD54B	rs12681366
		rs2919654
	RAG1	rs11033698
		rs2227973
		rs3740955
		rs3758873
	RB1	rs198590
		rs4151510
		rs9568036
	RPA1	rs1131636
		rs17338990
		rs17339382
		rs17339395
		rs2230931
		rs2270412
		rs2277694
		rs2287320
		rs2287321
		rs36088524
		rs7406062
	TP53BP1	rs16957730
		rs17782975
		rs2242069
		rs2253708
	TYMS	rs699517
	UNG	rs2541886
		rs2569987
		rs34260
		rs34261
	WRN	rs1346044
	XRCC1	rs1001581
		rs2023614
		rs2293036
		rs2854501
		rs3213266
		rs3213282
	XRCC3	rs3212038
		rs3212090
	XRCC4	rs10076056
		rs1011980
		rs10474079
		rs1193695
		rs13178127
		rs1478487
		rs1993947
		rs2731858
		rs2928175
		rs35268
		rs4703951
		rs9293330
	XRCC5	rs10490363
		rs11685387
		rs16855458
		rs16855489
		rs2032765
		rs207905
		rs207925
		rs207945
		rs2111959
		rs2303400
		rs6747119
		rs718601
		rs828701
		rs828704
		rs828910
		rs828918
	YY1	rs1042897
		rs4905941

## Sheet: Table S4
Table S4. Logistic regression analysis results for SNPs with pG<0.05 before multiple testing correction.
Subtype	Category	Gene	SNP	Coordinates*	Alleles	Odds ratio	95% CI	p-value	pG	pH
BCL	Cell death	TP73	rs3765703	1:3592436	T/G	0.724533	0.61-0.86	0.000316558	0.00443127	0.172819
		TP73	rs3765702	1:3592187	C/T	0.707741	0.58-0.86	0.000466449	0.00443127	-
		TP73	rs1885859	1:3583692	C/G	0.759912	0.64-0.91	0.00249062	0.0157739	-
		NEDD4	rs11630780	15:56128445	A/C	1.28764	1.08-1.53	0.0039	0.0312	0.4056
		CASP8	rs3769825	2:202111380	A/G	1.25132	1.05-1.49	0.0116903	0.0935223	0.729474
		CASP10	rs12693932	2:202093395	T/C	1.2338	1.04-1.46	0.0146123	0.0146123	0.284939
		TP73	rs10910003	1:3575929	G/A	0.736911	0.57-0.95	0.0167056	0.0793517	-
		TP73	rs3765701	1:3589001	A/T	0.807444	0.67-0.97	0.0248871	0.0945709	-
		BCL11A	rs7579014	2:60707894	A/G	1.23081	1.02-1.49	0.0333951	0.52478	0.999731
		TP73	rs3765715	1:3601798	A/T	0.7844	0.62-0.99	0.0382024	0.120974	-
		CD40	rs1321001	20:44816736	T/G	0.783325	0.62-0.99	0.0413455	0.999731	0.999731
		PARP1	rs6668851	1:226545866	A/C	1.22443	1.01-1.49	0.0430429	0.226032	0.768053
		RELB	rs1560725	19:45543787	T/C	1.19243	1.00-1.42	0.0441513	0.0654392	0.638032
	Inflammation & Immunity	IL7R	rs1494571	5:35880087	G/C	0.814893	0.67-0.99	0.0394373	0.125646	0.981175
		IRF4	rs2001508	6:404632	A/C	1.27377	1.01-1.61	0.0401984	0.26188	0.981175
		IL7	rs1545228	8:79644437	A/G	1.21379	1.00-1.47	0.0452422	0.140977	0.981175
		IL7	rs1036751	8:79641906	C/T	1.24142	1.00-1.54	0.0469923	0.140977	-
	DNA repair	MSH3	rs181747	5:80016874	T/C	1.3603	1.13-1.64	0.0012769	0.012769	0.196547
		E2F2	rs3218203	1:23837560	C/G	1.40856	1.13-1.76	0.00236454	0.0141872	0.196547
		APEX1	rs1130409	14:20925154	G/T	0.764396	0.64-0.91	0.00281777	0.00281777	0.135253
		E2F3	rs10946384	6:20495546	C/T	1.39525	1.12-1.74	0.00283013	0.0452821	0.401868
		MSH3	rs33003	5:80171134	G/A	1.36308	1.11-1.67	0.00286827	0.0143272	-
		MSH3	rs245397	5:80101773	C/T	1.38176	1.11-1.73	0.00429815	0.0143272	-
		RB1	rs4151510	13:48945175	G/A	0.679882	0.52-0.89	0.00545965	0.016379	0.196547
		MSH3	rs1650737	5:80001785	A/G	1.30044	1.07-1.58	0.0080134	0.0177134	-
		MSH3	rs6151627	5:79965536	A/G	0.766311	0.63-0.94	0.00885671	0.0177134	-
		CHEK1	rs492510	11:125497342	A/G	0.787653	0.66-0.94	0.00952264	0.0502335	0.401868
		LIG1	rs3731037	19:48623224	G/A	0.691496	0.51-0.93	0.0136569	0.0819413	0.561883
		MGMT	rs11016833	10:131331612	G/A	1.29645	1.04-1.61	0.0192648	0.250442	0.980296
		CHEK1	rs565416	11:125502467	C/T	0.800465	0.66-0.97	0.0219629	0.0502335	-
		CHEK1	rs537046	11:125509838	A/G	0.750079	0.58-0.96	0.0225763	0.0502335	-
		CHEK1	rs515255	11:125497145	A/G	0.821677	0.69-0.98	0.0251168	0.0502335	-
		RB1	rs9568036	13:48971936	A/G	0.838671	0.70-1.00	0.0478163	0.0717245	-
DLBCL	Cell death	TP73	rs3765703	1:3592436	T/G	0.664897	0.51-0.87	0.00272061	0.0302318	0.836263
		TP73	rs3765702	1:3592187	C/T	0.641291	0.48-0.87	0.0031823	0.0302318	-
		TP73	rs10910003	1:3575929	G/A	0.600973	0.40-0.90	0.0105877	0.0670556	-
		TP73	rs3765715	1:3601798	A/T	0.666706	0.46-0.96	0.0252906	0.12013	-
		TNFSF10	rs1823227	3:172240215	T/G	1.43039	1.04-1.97	0.0293995	0.22425	0.836263
		TP73	rs1885859	1:3583692	C/G	0.747442	0.57-0.98	0.0325477	0.123681	-
		MDM4	rs875093	1:204600719	G/A	0.752774	0.58-0.98	0.0367588	0.257312	0.836263
		APAF1	rs1439122	12:99076507	T/C	0.707966	0.50-0.99	0.040836	0.326688	0.848411
		REL	rs13031237	2:61136129	G/T	1.32816	1.01-1.75	0.0443043	0.0886086	0.836263
		TNFSF10	rs231981	3:172238498	G/A	0.661475	0.44-1.00	0.0448501	0.22425	-
	Inflammation & Immunity	LTA	rs2844484	6:31536224	G/A	0.648894	0.49-0.86	0.00183251	0.0146601	0.439803
		IL7R	rs1494571	5:35880087	G/C	0.658111	0.48-0.90	0.00700397	0.0350199	0.525298
		LTA	rs2239704	6:31540141	C/A	0.688875	0.52-0.92	0.00908427	0.0363371	-
		IRF4	rs2001508	6:404632	A/C	1.45492	1.04-2.04	0.0309528	0.309528	0.993494
	DNA repair	MSH3	rs33003	5:80171134	G/A	1.90976	1.41-2.59	2.97008e-05	0.000215	0.01032
		MSH3	rs181747	5:80016874	T/C	1.78558	1.35-2.36	4.29664e-05	0.000215	-
		MSH3	rs1650737	5:80001785	A/G	1.65489	1.25-2.20	0.000552549	0.00184183	-
		E2F3	rs2328524	6:20488234	G/A	1.54546	1.18-2.02	0.00134783	0.00857217	0.205732
		MSH3	rs245397	5:80101773	C/T	1.68821	1.23-2.32	0.00139654	0.00349135	-
		E2F3	rs10946384	6:20495546	C/T	1.70387	1.23-2.36	0.00156586	0.00857217	-
		E2F3	rs4134945	6:20483603	C/T	1.8509	1.27-2.70	0.00160728	0.00857217	-
		E2F3	rs2328488	6:20418329	C/T	1.48977	1.12-1.99	0.00725541	0.0290217	-
		LIG3	rs3744358	17:33336914	T/G	1.44894	1.10-1.92	0.0097356	0.0292068	0.350482
		CHEK1	rs537046	11:125509838	A/G	0.595177	0.39-0.90	0.0112346	0.0898772	0.862821
		E2F3	rs911361	6:20415053	G/A	0.711837	0.54-0.94	0.0143155	0.0458095	-
		ERCC5	rs17655	13:103528002	G/C	0.67219	0.48-0.95	0.0200409	0.0200409	0.320655
		LIG3	rs1003918	17:33332177	A/G	1.36905	1.05-1.79	0.0212926	0.0319388	-
		MSH3	rs6151627	5:79965536	A/G	0.706044	0.52-0.96	0.0241506	0.0483011	-
		MSH3	rs836797	5:80005911	A/T	0.737467	0.56-0.98	0.0325872	0.054312	-
		CDKN2A	rs3218009	9:21998757	C/G	0.637823	0.41-0.99	0.0359623	0.215774	0.948531
		XRCC5	rs11685387	2:216973814	C/T	0.731885	0.54-0.99	0.0359991	0.480125	0.948531
		E2F3	rs7752992	6:20425458	G/A	1.32935	1.02-1.73	0.0361736	0.0821076	-
		MSH6	rs3136329	2:48024876	T/C	1.31366	1.01-1.70	0.0391032	0.391032	0.948531
		E2F3	rs3806114	6:20482335	A/G	0.748329	0.56-0.99	0.0403183	0.0821076	-
		E2F3	rs12527393	6:20414340	T/C	0.725978	0.53-0.99	0.0410538	0.0821076	-
		CHEK1	rs565416	11:125502467	C/T	0.731936	0.54-1.00	0.044362	0.167986	-
FL	Cell death	TP73	rs3765695	1:3587377	C/A	0.64089	0.45-0.92	0.0117	0.2223	0.74557
		CASP1	rs580253	11:104900488	G/A	0.603616	0.40-0.91	0.0129039	0.0516157	0.629151
		MDM4	rs12740708	1:204557985	G/A	1.62669	1.07-2.48	0.0270685	0.0903386	0.629151
		PARP1	rs6668851	1:226545866	A/C	1.35938	1.03-1.80	0.0335229	0.125589	0.629151
		RELA	rs11820062	11:65429936	C/T	1.30936	1.02-1.68	0.0335408	0.0670815	0.629151
		MDM4	rs11240762	1:204566999	C/T	1.31039	1.02-1.68	0.0341016	0.0903386	-
		BIK	rs877334	22:43502707	T/C	0.653018	0.43-0.99	0.0355033	0.248523	0.74557
		TP73	rs3765692	1:3584771	T/C	0.72605	0.54-0.99	0.0359459	0.24309	-
		TP73	rs3765696	1:3587505	T/C	0.572507	0.33-1.00	0.0383826	0.24309	-
		MDM4	rs875093	1:204600719	G/A	0.767194	0.59-0.99	0.0401837	0.0903386	-
		PARP1	rs3219049	1:226576127	T/C	0.677854	0.46-1.00	0.041863	0.125589	-
		BCL11A	rs10184550	2:60729294	A/G	1.28825	1.01-1.65	0.0429273	0.35075	0.97709
		BCL11A	rs2058703	2:60679226	A/G	0.773632	0.60-1.00	0.0450525	0.35075	-
		RASSF1	rs2236947	3:50371432	C/A	0.770518	0.59-1.00	0.0493169	0.0986338	0.629151
		CD40	rs6074041	20:44780150	G/A	1.32327	1.00-1.75	0.0497535	0.695833	0.984121
	Inflammation & Immunity	IRF4	rs3778607	6:403799	G/A	0.722345	0.56-0.93	0.0107251	0.107251	0.91538
		JAK1	rs310244	1:65305877	G/A	1.44035	1.07-1.95	0.018717	0.149736	0.91538
	DNA repair	E2F2	rs3218203	1:23837560	C/G	1.66036	1.23-2.25	0.00116732	0.00700392	0.168094
		APEX1	rs1130409	14:20925154	G/T	0.678554	0.52-0.88	0.00361092	0.00361092	0.168094
		EXO1	rs4149867	1:242016590	C/T	0.58356	0.40-0.85	0.00403023	0.0685139	0.692954
		C11orf30	rs1939469	11:76236220	A/G	0.567766	0.37-0.87	0.00714255	0.0357127	0.571404
		XRCC4	rs1478487	5:82376719	T/A	0.72471	0.56-0.94	0.0134582	0.161498	0.70472
		MSH3	rs6151627	5:79965536	A/G	0.696576	0.52-0.94	0.0142218	0.142218	0.692954
		BIN3	rs4872529	8:22513346	T/A	0.7261	0.55-0.96	0.0210699	0.0842797	0.692954
		MGMT	rs11016833	10:131331612	G/A	1.41246	1.03-1.94	0.0342305	0.444997	0.956398
		CHEK1	rs492510	11:125497342	A/G	0.752704	0.58-0.98	0.0355056	0.284045	0.956398
		XRCC4	rs2928175	5:82391625	A/G	0.64222	0.42-0.99	0.0358617	0.164476	-
		MSH3	rs181747	5:80016874	T/C	1.3322	1.01-1.75	0.0416055	0.178528	-
		C11orf30	rs3758715	11:76254539	C/T	0.690852	0.48-1.00	0.0460894	0.115224	-
		E2F3	rs10946384	6:20495546	C/T	1.38186	1.01-1.89	0.0462144	0.445865	0.956398
		RB1	rs4151510	13:48945175	G/A	0.660582	0.43-1.01	0.0481218	0.144366	0.692954
		RAD54B	rs2919654	8:95476273	T/A	0.779334	0.61-1.00	0.0482462	0.0964925	0.692954
		XRCC4	rs1011980	5:82393549	A/G	1.33237	1.00-1.77	0.0491008	0.164476	-
MZL	Cell death	RELB	rs12609547	19:45532009	G/T	2.02796	1.34-3.07	0.000726434	0.00145287	0.0566619
		TP73	rs1181868	1:3651126	T/G	1.98734	1.31-3.01	0.00134414	0.0255387	0.249002
		RELB	rs1560725	19:45543787	T/C	1.85641	1.22-2.82	0.00337561	0.00337561	-
		CASP10	rs12693932	2:202093395	T/C	1.75415	1.16-2.64	0.00631037	0.00631037	0.123052
		NFKB1	rs1609798	4:103537442	C/T	1.80103	1.17-2.77	0.00802403	0.0882643	0.491758
		CD40	rs1321001	20:44816736	T/G	0.422376	0.21-0.86	0.00916197	0.311507	0.680343
		CASP8	rs3769825	2:202111380	A/G	1.74164	1.14-2.67	0.00985648	0.064372	0.418418
		CASP8	rs12990906	2:202114624	C/T	1.64642	1.09-2.48	0.016093	0.064372	-
		IL8RB	rs1126579	2:219000734	T/C	0.589202	0.37-0.93	0.0214795	0.0214795	0.249002
		CASP3	rs4647609	4:185567962	A/G	0.479346	0.24-0.95	0.0217652	0.130591	0.565894
		TP73	rs1885859	1:3583692	C/G	0.611898	0.40-0.94	0.0224783	0.213544	-
		BMF	rs500804	15:40393262	G/A	0.57754	0.35-0.95	0.0237216	0.103495	0.50454
		BMF	rs11634257	15:40388492	T/A	1.60445	1.07-2.42	0.0258738	0.103495	-
		BCL11A	rs2556376	2:60760032	A/C	0.469179	0.23-0.97	0.027165	0.5433	0.921248
		MDM4	rs11240762	1:204566999	C/T	0.62953	0.41-0.96	0.0293955	0.205769	0.668748
		APAF1	rs1439122	12:99076507	T/C	0.560909	0.32-0.97	0.0304737	0.24379	0.679129
		TP73	rs3765715	1:3601798	A/T	0.536332	0.29-1.01	0.0398333	0.252277	-
	Inflammation & Immunity	LTA	rs915654	6:31538497	T/A	0.418772	0.24-0.74	0.00137085	0.0109668	0.329005
		JAK3	rs3212701	19:17957024	C/T	1.7932	1.16-2.78	0.0103663	0.0725642	0.608085
		IFNAR2	rs2248420	21:34605778	C/T	1.57134	1.04-2.37	0.0323382	0.226368	0.848879
	DNA repair	CHEK2	rs5762746	22:29088123	C/T	1.86641	1.25-2.78	0.00198356	0.0159548	0.382914
		CHEK2	rs1033667	22:29130300	C/T	1.8266	1.22-2.73	0.0035455	0.0159548	-
		YY1	rs4905941	14:100725438	A/G	0.514346	0.31-0.86	0.00761388	0.0152278	0.382914
		CHEK2	rs5762763	22:29132389	G/C	0.553512	0.34-0.91	0.0151773	0.045532	-
		MGMT	rs10829626	10:131559711	C/G	0.582897	0.36-0.94	0.0226653	0.294649	0.847171
		CHEK2	rs1076807	22:29102335	A/T	0.322636	0.10-1.05	0.0273618	0.060936	-
		E2F3	rs10946384	6:20495546	C/T	1.74263	1.07-2.85	0.0306561	0.386844	0.847171
		CHEK2	rs4035540	22:29087041	C/T	1.64686	1.05-2.59	0.0338533	0.060936	-
		MSH3	rs245397	5:80101773	C/T	1.69534	1.05-2.73	0.0347957	0.187493	0.847171
		RPA1	rs2270412	17:1792174	G/A	0.555924	0.31-0.99	0.035073	0.374843	0.847171
		PMS2	rs12112229	7:6036515	C/A	0.591794	0.35-0.99	0.0369524	0.147809	0.847171
		MSH3	rs1650737	5:80001785	A/G	1.63026	1.03-2.57	0.0374986	0.187493	-
		LIG4	rs1805388	13:108863591	G/A	1.80654	1.03-3.16	0.0432807	0.259684	0.847171
		XRCC5	rs828701	2:216990971	T/C	0.625264	0.39-1.00	0.0441966	0.449528	0.847171
		HIC1	rs12451211	17:1965542	A/G	0.569482	0.32-1.02	0.0469076	0.0924679	0.847171
		E2F3	rs4134945	6:20483603	C/T	1.77698	1.02-3.09	0.0483555	0.386844	-
MCL	Cell death	CASP8	rs1035142	2:202153078	G/T	2.25228	1.41-3.60	0.000562207	0.00449766	0.175409
		TP73	rs3765702	1:3592187	C/T	0.467861	0.27-0.81	0.00429763	0.081655	0.767058
		BAK1	rs17627049	6:33537802	C/A	0.39775	0.19-0.83	0.00639722	0.0447805	0.582147
		BCL11A	rs6738440	2:60722241	A/G	0.459962	0.25-0.85	0.00698357	0.139671	0.767058
		APAF1	rs7299536	12:99101410	G/A	1.89485	1.14-3.14	0.0137116	0.109693	0.767058
		NFKB1	rs1599961	4:103443569	G/A	0.523317	0.30-0.91	0.0178801	0.196681	0.767058
		CDH22	rs3915737	20:44871381	A/C	0.492105	0.26-0.94	0.0214737	0.0214737	0.418737
		PAX5	rs7044118	9:36847139	A/G	1.8301	1.10-3.05	0.0236092	0.330529	0.934896
		NEDD4	rs8033275	15:56138427	T/C	0.481198	0.24-0.98	0.0278851	0.223081	0.790922
		CD40	rs2425795	20:44868295	T/C	0.540407	0.30-0.97	0.0318715	0.657938	0.950354
		CASP8	rs7608692	2:202110959	G/A	0.500989	0.25-1.00	0.0359375	0.134003	-
		CD40	rs4813001	20:44762857	G/C	1.83812	1.06-3.19	0.0387022	0.657938	-
		ZFX	rs6629824	X:24236638	T/G	0.660207	0.43-1.00	0.040505	0.165335	0.767058
		BCL11A	rs766432	2:60719970	A/C	1.79889	1.03-3.13	0.044513	0.363432	-
		NFKB1	rs93059	4:103468518	G/A	1.60371	1.01-2.55	0.0446071	0.245339	-
	Inflammation & Immunity	PRDM1	rs6924807	6:106531266	A/G	0.439191	0.25-0.76	0.00184779	0.0147823	0.28303
		JAK3	rs10419991	19:17938891	A/G	0.462705	0.27-0.78	0.00269552	0.0188686	0.28303
		JAK3	rs3212760	19:17947546	A/G	0.512386	0.30-0.88	0.0113966	0.0398882	-
		JAK1	rs17127114	1:65335831	G/A	0.240021	0.06-1.01	0.015571	0.124568	0.415226
		IRF4	rs872071	6:411064	G/A	0.559586	0.34-0.91	0.0177792	0.11698	0.415226
		IRF4	rs12211228	6:408833	G/C	0.353747	0.13-1.00	0.023396	0.11698	-
		CD69	rs3176800	12:9906489	G/A	0.515015	0.28-0.96	0.0259552	0.103821	0.415226
		PRDM1	rs9372117	6:106529777	T/G	1.68036	1.06-2.66	0.027251	0.109004	-
	DNA repair	LIG4	rs1151402	13:108858030	C/T	0.402096	0.23-0.69	0.000416918	0.00250151	0.120072
		LIG4	rs12428162	13:108871915	G/C	2.41751	1.44-4.05	0.000841791	0.00252537	-
		LIG4	rs1805386	13:108861913	A/G	2.46354	1.43-4.24	0.0015617	0.0031234	-
		XRCC5	rs718601	2:217071809	C/T	0.45892	0.26-0.81	0.00380226	0.0608362	0.905763
		XRCC5	rs207925	2:217033760	A/G	0.496993	0.28-0.87	0.00874786	0.0699829	-
		CHEK2	rs1033667	22:29130300	C/T	0.484011	0.27-0.88	0.0104295	0.0938654	0.905763
		CDKN2A	rs2811710	9:21991923	C/T	0.553661	0.32-0.94	0.022644	0.135864	0.905763
		CHEK2	rs5762746	22:29088123	C/T	0.561047	0.33-0.95	0.0238691	0.107411	-
		XRCC5	rs207945	2:217045939	C/T	0.594971	0.37-0.95	0.0262321	0.139854	-
		RAG1	rs11033698	11:36606093	T/G	2.08351	1.09-3.97	0.0312969	0.125188	0.905763
		XRCC5	rs11685387	2:216973814	C/T	1.64597	1.04-2.60	0.0349635	0.139854	-
		CHEK1	rs565416	11:125502467	C/T	0.556733	0.31-0.99	0.0369281	0.170426	0.905763
		EXO1	rs11581448	1:242009816	C/G	0.604857	0.37-0.98	0.0393652	0.669209	0.989238
		CHEK1	rs515255	11:125497145	A/G	0.616172	0.38-0.99	0.0426065	0.170426	-
		MGMT	rs11016803	10:131262915	A/G	1.6114	1.01-2.56	0.0469944	0.362799	0.989238
TCL	Cell death	CASP4	rs1944900	11:104838471	C/T	0.338798	0.15-0.75	0.0019931	0.0119586	0.466385
		CD40	rs6131030	20:44807986	G/A	0.446411	0.25-0.80	0.0037745	0.082463	0.730825
		CD40	rs6074061	20:44813304	C/G	0.446288	0.24-0.82	0.00485076	0.082463	-
		ITCH	rs4911154	20:32996101	G/A	2.06092	1.21-3.52	0.0102741	0.0308224	0.47519
		CD40	rs4810488	20:44782609	C/A	0.43575	0.22-0.88	0.0106087	0.120232	-
		BCL11A	rs733628	2:60702766	T/C	2.06746	1.18-3.61	0.0159282	0.318565	0.730825
		CD40	rs4142256	20:44787538	G/C	2.08199	1.17-3.71	0.0165479	0.140657	-
		RASSF1	rs2236947	3:50371432	C/A	1.77514	1.10-2.88	0.0182765	0.0365531	0.47519
		BID	rs366542	22:18258382	C/T	1.67625	1.04-2.71	0.0317279	0.306637	0.730825
		CASP8	rs6736233	2:202118974	G/C	2.18697	1.11-4.32	0.0334516	0.267613	0.730825
		IGFBP3	rs2471551	7:45957055	G/C	1.69227	1.05-2.72	0.0341984	0.136794	0.730825
		APAF1	rs17028590	12:99071681	A/G	1.95112	1.08-3.52	0.0368635	0.294908	0.730825
		ZFX	rs17312136	X:24190977	A/G	0.358066	0.10-1.26	0.0388309	0.232985	0.730825
		BID	rs424708	22:18214192	C/G	1.69845	1.03-2.79	0.0438052	0.306637	-
		CD40	rs3904164	20:44900262	A/T	0.40177	0.14-1.12	0.0462961	0.293234	-
		ITCH	rs6059851	20:33047945	A/G	1.60927	0.99-2.61	0.0499267	0.0570916	-
	Inflammation & Immunity	IRF4	rs872071	6:411064	G/A	0.513584	0.32-0.84	0.00575053	0.0575053	0.575053
		IFNB1	rs1051922	9:21077716	G/A	1.74725	1.14-2.68	0.0112625	0.0112625	0.337875
		IL6	rs2069840	7:22768572	C/G	1.85908	1.13-3.05	0.0142094	0.0426281	0.575053
		IL7R	rs11567762	5:35873201	G/A	2.08511	1.16-3.76	0.0191258	0.083674	0.627555
		IRF4	rs12211228	6:408833	G/C	0.342889	0.12-0.97	0.0202363	0.101181	-
		LTA	rs2844484	6:31536224	G/A	0.604582	0.38-0.96	0.0294055	0.235244	0.784146
		IL7R	rs1353251	5:35857207	C/T	1.77199	1.06-2.96	0.0334696	0.083674	-
		PRDM1	rs4946722	6:106532446	C/A	0.42691	0.17-1.07	0.0417662	0.33413	0.801044
	DNA repair	EXO1	rs1776131	1:242024245	A/T	0.487626	0.30-0.80	0.00304702	0.0517993	0.98949
		MSH6	rs6713506	2:48038331	G/A	1.99705	1.23-3.25	0.00708052	0.0708052	0.98949
		EXO1	rs9350	1:242048674	C/T	2.00327	1.19-3.36	0.011192	0.0666551	-
		EXO1	rs1635510	1:242027500	T/G	1.78829	1.13-2.83	0.0117627	0.0666551	-
		EXO1	rs7521516	1:242057540	T/C	0.50655	0.28-0.93	0.0182482	0.0775547	-
		RPA1	rs2230931	17:1795180	T/C	2.0439	1.14-3.65	0.0191111	0.0855849	0.98949
		EXO1	rs1776148	1:242042545	G/A	0.564906	0.34-0.94	0.0236437	0.0803886	-
		RPA1	rs17339395	17:1802501	G/A	1.82524	1.09-3.06	0.0259721	0.0855849	-
		RPA1	rs1131636	17:1801189	T/C	1.62992	1.05-2.54	0.0305056	0.0855849	-
		EXO1	rs1776181	1:242011244	G/A	0.611369	0.39-0.96	0.0309758	0.0877648	-
		RPA1	rs2270412	17:1792174	G/A	0.520883	0.28-0.98	0.0311218	0.0855849	-
		XRCC4	rs35268	5:82588496	T/C	0.462126	0.21-1.02	0.0339648	0.213981	0.98949
		ATR	rs11707731	3:142287627	G/T	0.538351	0.29-1.01	0.0398945	0.268393	0.98949
		MGMT	rs11016833	10:131331612	G/A	1.71682	1.02-2.88	0.0454728	0.591146	0.98949
		XRCC4	rs13178127	5:82589432	A/G	2.26969	1.06-4.86	0.0468199	0.213981	-
* Coordinates obtained from Ensembl 64.

## Sheet: Table S5
Table S5. The best model for rs33003 in European-ancestry DLBCL vs controls is the recessive model
A. Genotypic tests by chi-squared methodology
Model	Alleles	n (cases)	n (controls)	Odds ratio	95% CI	p-trend*
Additive	GG	28	26	4.33	2.35-7.98	5.36e-05
	GA	54	217	1.11	0.72-1.70
	AA	50	223	1	-
	unknown	16	81	-	-
Dominant	GG,GA	82	243	1.51	1.01-2.24	0.0424
	AA	50	223	1	-
	unknown	16	81	-	-
Recessive	GG	28	26	4.55	2.56-8.1	3.25e-08
	GA,AA	104	440	1	-
	unknown	16	81	-	-
B. Logistic regression analysis with correction for sex, region and 5-year age group
Model	Odds ratio	95% CI	p-value*
Additive	1.91	1.41-2.59	2.97e-05
Recessive	5.23	2.88-9.57	8.48e-08
*No correction for multiple testing
